# Supplementary material for: An Inflammatory Signature to Predict the Clinical Benefit of First-Line Cetuximab Plus Platinum-Based Chemotherapy in Recurrent/Metastatic Head and Neck Cancer
Source: MDPI journal article supplement (doi:10.3390/cells11193176), 2022-10-10
Supplement: s1 [file s1]

| Supplementary Table S1 |                              | Univariable analysis |         | Multivariable analysis |         |
|------------------------|------------------------------|----------------------|---------|------------------------|---------|
| PFS                    |                              | HR (95% CI)          | P-value | HR (95% CI)            | P-value |
| inflammatory signature | high score group (reference) |                      | 0.0025  |                        | 0.00069 |
| inflammatory signature | low score group              | 2.35 (2.10-2.59)     |         | 2.4 (1.49-3.9)         |         |
| inflammatory signature | intermediate score group     | 1.42 (1.19-1.66)     |         | 1.5 (0.92-2.4)         |         |
| ECOG PS                | 1 vs 0                       | 1.28 (1.08-1.48)     | 0.213   | 1.5 (0.98-2.2)         | 0.062   |
| subsite                | oropharynx vs other          | 1.52 (1.33-1.72)     | 0.031   | 1.5 (1.04-2.3)         | 0.031   |

|                        |                              | Univariable analysis |         | Multivariable analysis |         |
|------------------------|------------------------------|----------------------|---------|------------------------|---------|
| OS                     |                              | HR (95% CI)          | P-value | HR (95% CI)            | P-value |
| inflammatory signature | high score group (reference) |                      | 0.00022 |                        | 0.00011 |
| inflammatory signature | low score group              | 3 (2.73-3.27)        |         | 3.3 (1.92-5.7)         |         |
| inflammatory signature | intermediate score group     | 1.37 (1.1-1.63)      |         | 1.5 (0.89-2.5)         |         |
| ECOG PS                | 1 vs 0                       | 1.39 (1.18-1.6)      | 0.117   | 1.7 (1.08-2.5)         | 0.02    |
| subsite                | oropharynx vs other          | 1.31 (1.1-1.52)      | 0.193   | 1.3 (0.88-2.0)         | 0.178   |
